# Supplementary material
Source: publisher figshare collection journal article supplement (https://tandf.figshare.com/ndownloader/files/38303771)
Supplement: Supplementary file 1 [file 38303771]

## Appendix 1: Overview of Invest in Youth Coalition Organizations.

| Organization (order reflects listing on <a href="https://www.investinyouthlb.org/">https://www.investinyouthlb.org/</a> ) | Type                                     | Targeted constituency                                   | Issue areas                                                   |
|---------------------------------------------------------------------------------------------------------------------------|------------------------------------------|---------------------------------------------------------|---------------------------------------------------------------|
| Khmer Girls in Action                                                                                                     | Organizing                               | Southeast Asian youth in Long Beach                     | Gender, racial, economic, health justice                      |
| Californians for Justice                                                                                                  | Organizing                               | Youth of color statewide                                | Racial and educational justice                                |
| Gender and Sexualities Alliance Network                                                                                   | Organizing                               | Queer, trans, and allied youth statewide                | Racial and gender justice                                     |
| California Conference for Equality and Justice                                                                            | Education, conflict resolution, advocacy | Youth, educators, allies                                | Education/training/advocacy for social justice issues broadly |
| Educated Men with Meaningful Messages                                                                                     | Advocacy, education                      | Southeast Asian men in Long Beach                       | Youth development, leadership skills, healing trauma          |
| Success in Challenges/Children's Defense Fund-California                                                                  | Advocacy, direct services                | Black & Latinx children                                 | Positive youth development                                    |
| Filipino Migrant Center                                                                                                   | Organizing                               | Filipino communities in South Bay cities                | Immigrant justice, worker rights, educational justice, Health |
| Advancement Project                                                                                                       | Advocacy                                 | Supports community partners with policy/ legal research | Racial justice, budget justice                                |

## Appendix 2. IY-LB leaders quoted.

| Name   | Current organization & campaign role                                                                                             |
|--------|----------------------------------------------------------------------------------------------------------------------------------|
| Mac    | GSAN (Gender and Sexualities Alliance Network) youth leader, Invest in Youth leader & strategic planning Youth Ambassador        |
| Noah   | CCEJ (California Conference for Equality and Justice) youth leader, Invest in Youth leader & strategic planning Youth Ambassador |
| Alexis | KGA (Khmer Girls in Action) youth leader, Invest in Youth leader & strategic planning Youth Ambassador                           |
| Janice | CFJ (Californians for Justice) youth leader, Invest in Youth leader & strategic planning Youth Ambassador                        |
| Jenn   | KGA lead organizer                                                                                                               |
| Omar   | Former KGA lead organizer, current CFJ Long Beach Organizing Director                                                            |
| Lian   | KGA Executive Director                                                                                                           |
| Joy    | KGA Communications Director                                                                                                      |

Note: The authors received permission from all leaders quotes to use their real names.
